# Supplementary material for: A ratiometric small-molecule fluorescent probe for the selective detection of hypochlorite by an oxidative cyclization reaction: application to commercial disinfectants and live cells
Source: Royal Society of Chemistry journal article supplement (doi:10.1039/d3ob01831h), 2024-01-01
Supplement: d3ob01831h1.pdf [file d3ob01831h1.pdf]

**A Ratiometric Small-Molecule Fluorescent Probe for the Selective  
Detection of Hypochlorite by an Oxidative Cyclization Reaction:  
Application to Commercial Disinfectants and Live Cells**

Shilpita Banerjee<sup>a</sup>, Dipanjan Banik<sup>a</sup>, Satyajit Halder<sup>b</sup>, Anirban Karak<sup>a</sup>, Pintu Ghosh<sup>a</sup>, Kuladip Jana<sup>b</sup>, Ajit Kumar Mahapatra<sup>a\*</sup>

*<sup>a</sup> Molecular Sensor and Supramolecular Chemistry Laboratory, Department of Chemistry,  
Indian Institute of Engineering Science and Technology, Shibpur,  
Howrah 711 103, India*

*<sup>b</sup> Division of Molecular Medicine, Bose Institute, P 1/12, CIT Scheme VIIM, Kolkata-700 054,  
India.*

\*Author to whom correspondence should be addressed; electronic mail:  
[akmahapatra@chem.iiests.ac.in](mailto:akmahapatra@chem.iiests.ac.in); Tel.: +91 – 9434508013

\*Corresponding author. Fax: +91 33 26684564; Tel: +91 33 2668 4561;  
E-mail: mahapatraiiests@gmail.com (A. K. Mahapatra)

## Table of Contents

1. Comparison table of previously reported hypochlorite sensors
2. Solid state hypochlorite sensing
3. Computational method
4. Live cell imaging study
5. Calculation of LOD
6. pH effect,
7. Application of the probe in water samples
8. Calculation of first order rate constant
9. Emission spectra of probe
10. Job's plot
11. Binding Constant
12. NMR spectra of aldehyde, probe and product
13. Mass spectra of aldehyde, probe and product
14. References

**1. Table S1 Comparison between previously reported ClO<sup>-</sup> sensors with the current work**

| Sl. No. | Probe structure                                                                     | Solvent                      | Sensor type | LOD      | Application                     | Reference |
|---------|-------------------------------------------------------------------------------------|------------------------------|-------------|----------|---------------------------------|-----------|
| 1.      | 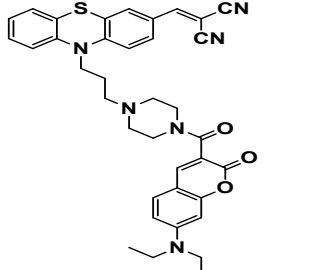   | DMSO                         | Ratiometric | 0.321 μM | RAW264.7 macrophage cells       | 1         |
| 2.      |    | DCM                          | Ratiometric | 36 nM    | HeLa cells                      | 2         |
| 3.      |  | Ethanol                      | Ratiometric | 1.7 nM   | A549 cells                      | 3         |
| 4.      |  | Ethanol                      | Turn on     | 0.015 μM | A549 cells                      | 4         |
| 5.      |  | Nearly 100% aqueous solution | Turn on     | 25 nM    | Sprouts, Arabidopsis, Zebrafish | 5         |
| 6.      |  | DMF                          | Turn on     | 4.2 μM   | Zebrafish                       | 6         |

|     |                                                                                     |      |             |                         |                          |           |
|-----|-------------------------------------------------------------------------------------|------|-------------|-------------------------|--------------------------|-----------|
| 7.  | 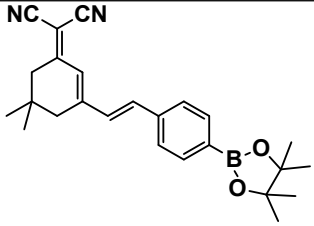   |      | Turn on     | 1.46 $\mu$ M            | Zebrafish                | 7         |
| 8.  |    | DMF  | Ratiometric | 14 nM                   | Test strips              | 8         |
| 9.  |   | THF  | Turn on     | $8.05 \times 10^{-7}$ M | Human breast cancer cell | 9         |
| 10. |  | DMSO | Ratiometric | 8.74 nM                 | Human breast cancer cell | This work |

## 2. Solid state ClO<sup>-</sup> sensing:

Small pieces of TLC sticks were coated with  $1 \times 10^{-5}$  M probe solution in aqueous DMSO followed by drying in an oven. The sticks were then dipped into different concentrated solutions of aqueous NaOCl and dried for 20 minutes. The sensing behaviour of the probe TPBN was examined and photographs were taken.

## 3. Computational method:

### Theoretical calculations:

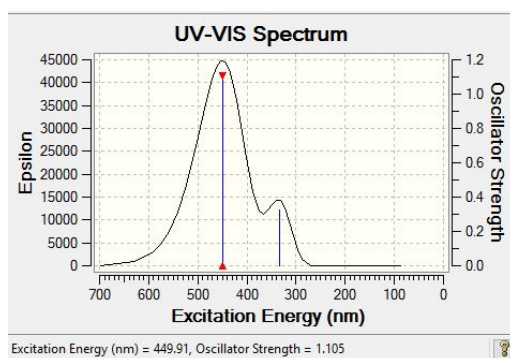

**Figure S1.** Absorption spectra of the Probe (TPBN)

**Table S2** The vertical main orbital transition of the TPBN calculated by TDDFT method

| Energy (eV) | Wavelength (nm) | Osc. Strength (f) | Transition     |
|-------------|-----------------|-------------------|----------------|
| 2.7557      | 449.91          | 1.1050            | HOMO → LUMO    |
| 3.7043      | 334.71          | 0.3262            | HOMO → LUMO +1 |
| 3.7098      | 334.21          | 0.0267            | HOMO-1 → LUMO  |

#### 4. Live cell imaging study:

##### 4.1 Cell line study:

To conduct this research, we obtained the NKE human normal kidney epithelial cell line and the MDA-MB 231 human breast cancer cell line from the National Center for Cell Science (NCCS) in Pune, India. The cell lines were cultured in T25 flasks using a medium composed of DMEM supplemented with 10% Fetal Bovine Serum (FBS), 1 mM sodium pyruvate, 2 mM L-glutamine, non-essential amino acids, 100 units/L penicillin, 100 mg/L streptomycin, and 50 mg/L gentamycin. These cells were maintained in a humidified incubator at 37 °C with 5% CO<sub>2</sub> to ensure their continued viability.

##### 4.2 Cytotoxicity assay:

The cytotoxicity of the TPBN ligand was evaluated using the MTT cell proliferation assay<sup>10,11</sup> on both the MDA-MB-231 cancer cell line and the NKE normal cell line. In this experiment, cells were initially seeded in 96-well plates at a density of  $1 \times 10^4$  cells per well and allowed to adhere for 24 hours before exposure to various concentrations of TPBN ligand (0 μM, 10 μM, 20 μM, 40 μM, 80 μM, 100 μM) for 24 hours. After the treatment period, the culture media was removed from each well, and the cells were washed with 1x PBS. Subsequently, each well was treated with 0.5 mg/ml of MTT solution and incubated for 4 hours, followed by a PBS rinse. The resulting formazan crystals were dissolved in DMSO, and the absorbance was measured at 570 nm using a microplate reader. The measurement of cell viability was expressed as a percentage relative to the control experimental setup

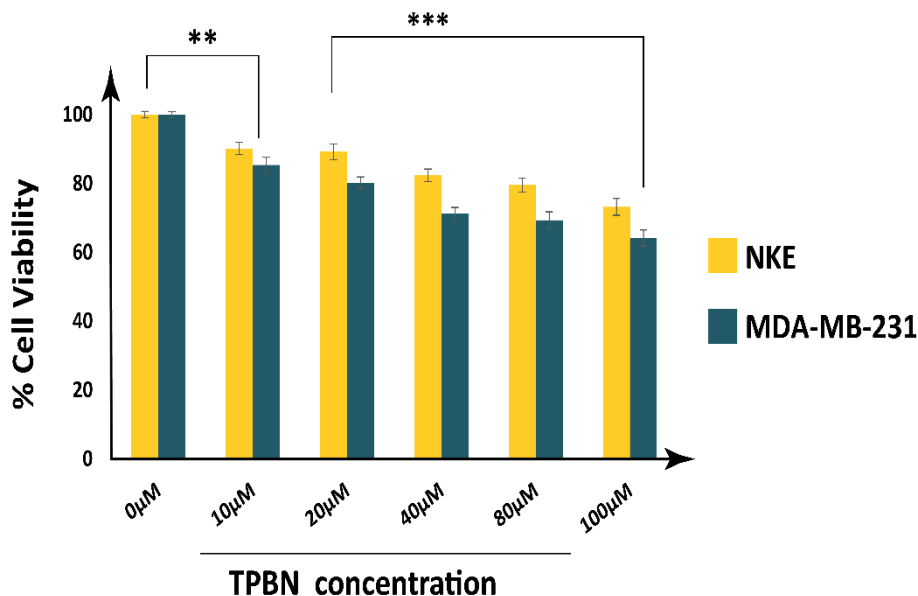

**Figure S2.** Cell survivability of MDA-MB 231 and NKE cells exposed to different ligand TPBN concentration. Data are representative of at least three independent experiments and bar graph shows mean  $\pm$  SEM, \*\*\* $p < 0.0001$ , \*\* $p < 0.001$  were interpreted as statistically significant, as compared with the control.

### 5. Calculation of Limit of detection:

From the plot of fluorescence intensity ratio  $I_{434}/I_{527}$  vs concentration of  $\text{ClO}^-$  limit of detection was calculated by using the formula  $\text{LOD} = k \times \delta / m$  where  $k = 3$ ,  $\delta$  is the standard deviation of the intensity ratio ( $I_{434}/I_{527}$ ) of blank solution (0.003488) and  $m$  is the slope of the calibration curve ( $1.1974 \times 10^6$ ).

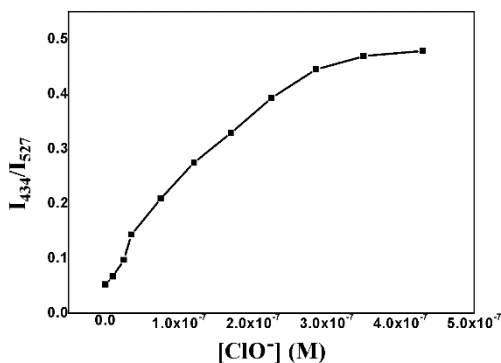

**Figure S3.** Plot of fluorescence intensity ratio vs concentration of  $\text{ClO}^-$

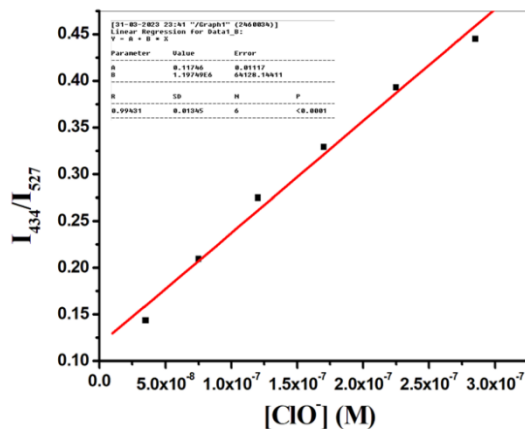

**Figure S4.** Calibration of the probe at an intensity ratio  $I_{434}/I_{527}$  depending on  $\text{ClO}^-$  concentration.

LOD= 8.74 nM ( $R^2=0.994$ )

### 6.pH effect:

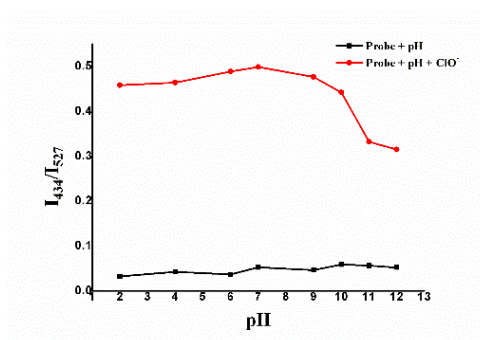

**Figure S5.** Variation of fluorescence intensity ratio ( $I_{434}/I_{527}$ ) of TPBN with the change in pH in DMSO/ $\text{H}_2\text{O}$  (4:6 v/v) solution ( $\lambda_{\text{ex}}=411$  nm).

## 7. Application of the probe in water samples:

**Table S3: Water sample study for TPBN**

| Water sample | Spiked ( $\mu\text{M}$ ) $\text{ClO}^-$ | Found ( $\mu\text{M}$ ) | % Recovery | RSD (%) |
|--------------|-----------------------------------------|-------------------------|------------|---------|
| Tap water    | 20                                      | 19.69 ( $\pm 0.23$ )    | 98.45      | 1.16    |
|              | 25                                      | 24.67 ( $\pm 0.41$ )    | 98.7       | 1.66    |
| Pond water   | 20                                      | 19.08 ( $\pm 0.26$ )    | 95.4       | 1.36    |
|              | 25                                      | 24.12 ( $\pm 0.38$ )    | 96.5       | 1.57    |

## 8. Calculation of first order rate constant ( $k'$ ):

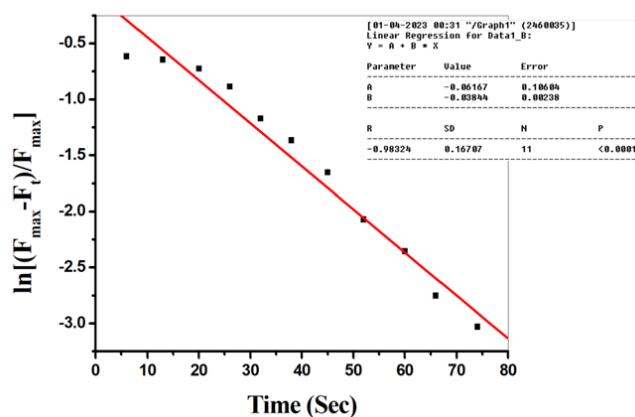

**Figure S6.** First order kinetic plot of probe ( $1 \times 10^{-5} \text{M}$ ) in the presence of  $1 \times 10^{-4} \text{M}$   $\text{ClO}^-$  solution ( $\lambda_{\text{ex}} = 411 \text{ nm}$ )

First order rate constant  $k' = 0.0384 \text{ s}^{-1}$

## 9. Emission spectra of

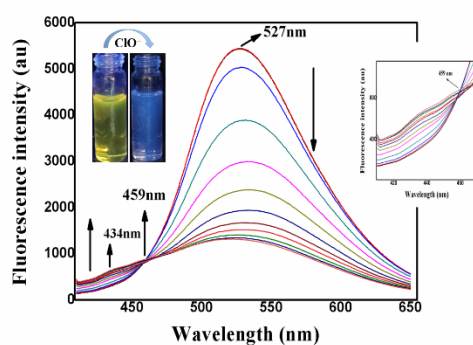



**Figure S7.** Fluorescence intensity changes of TPBN ( $1 \times 10^{-5} \text{M}$ ) upon gradual addition of NaOCl in **DMSO-water** (4:6 v/v) ( $\lambda_{\text{ex}}=411 \text{ nm}$ ).

### 10. Job's plot of the probe TPBN for $\text{ClO}^-$

Job's plots were drawn by plotting  $\Delta I \cdot X(\text{host})$  vs  $X(\text{host})$  ( $\Delta I$  = change of intensity ratio of the emission spectrum [ $I_{434}/I_{527}$ ] for TPBN during titration and  $X(\text{host})$  is the mole fraction of the analyte in each case respectively).

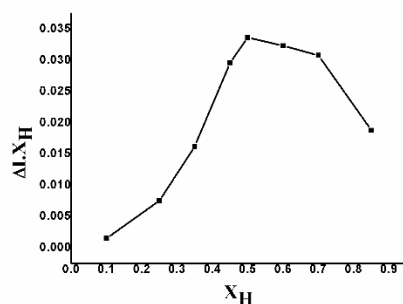

**Figure S8.** Job's plot of TPBN with  $\text{ClO}^-$  using fluorescence data

### 11. Determination of binding constant value ( $K_a$ ) using linear method for TPBN

Binding constant value ( $K_a$ ) was calculated by plotting  $1/\Delta I$  vs  $1/[G]$  [ $\Delta I$ = change of intensity ratio of the emission spectrum [ $I_{434}/I_{527}$ ] for TPBN during titration and  $[G]$  is the concentration of  $\text{ClO}^-$  in each case respectively).

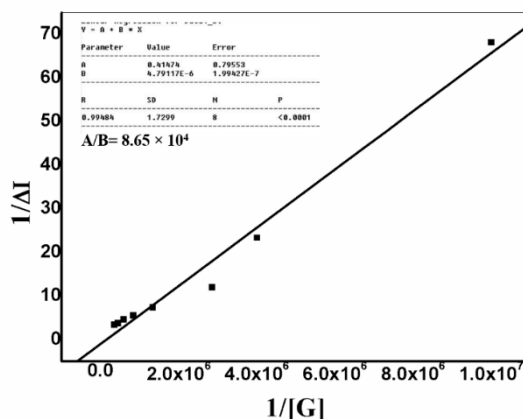

Binding constant  $K_a(A/B) = 8.65 \times 10^4$

**Figure S9.** Binding constant value of TPBN with  $\text{ClO}^-$  using fluorescence data

## 12. NMR spectra: $^1\text{H}$ -NMR, $^{13}\text{C}$ -NMR

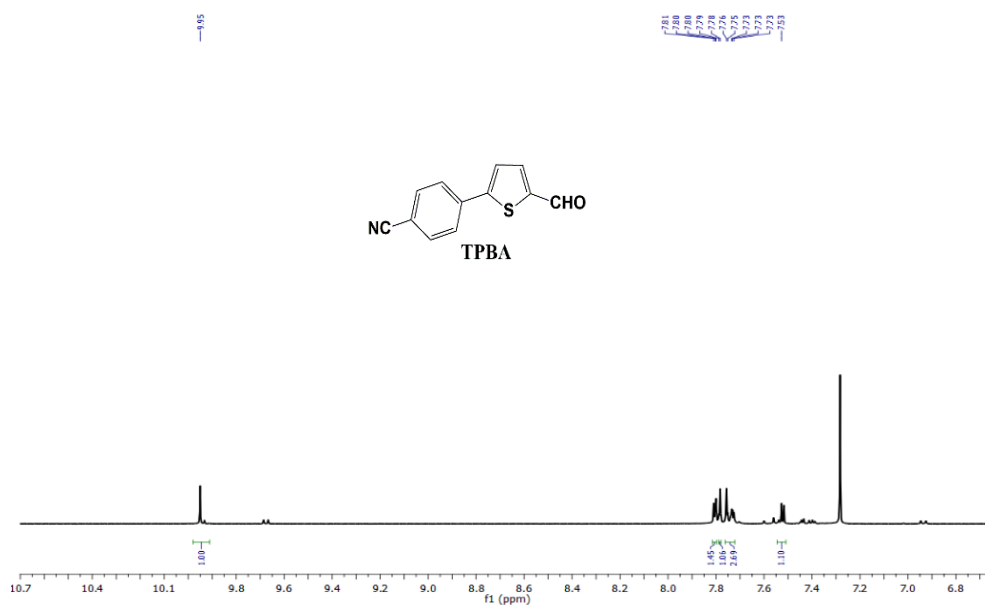

**Figure S10:**  $^1\text{H}$ -NMR spectra of TPBA in  $\text{CDCl}_3$

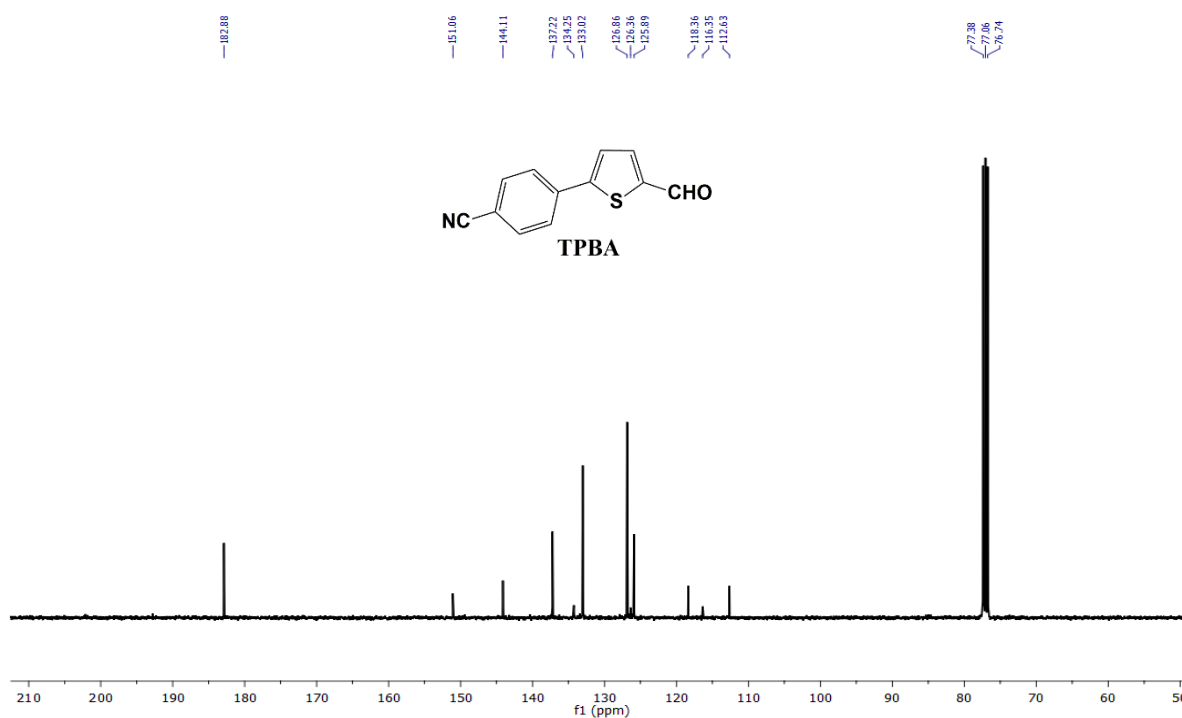

Figure S11:  $^{13}\text{C}$ -NMR spectra of TPBA in  $\text{CDCl}_3$

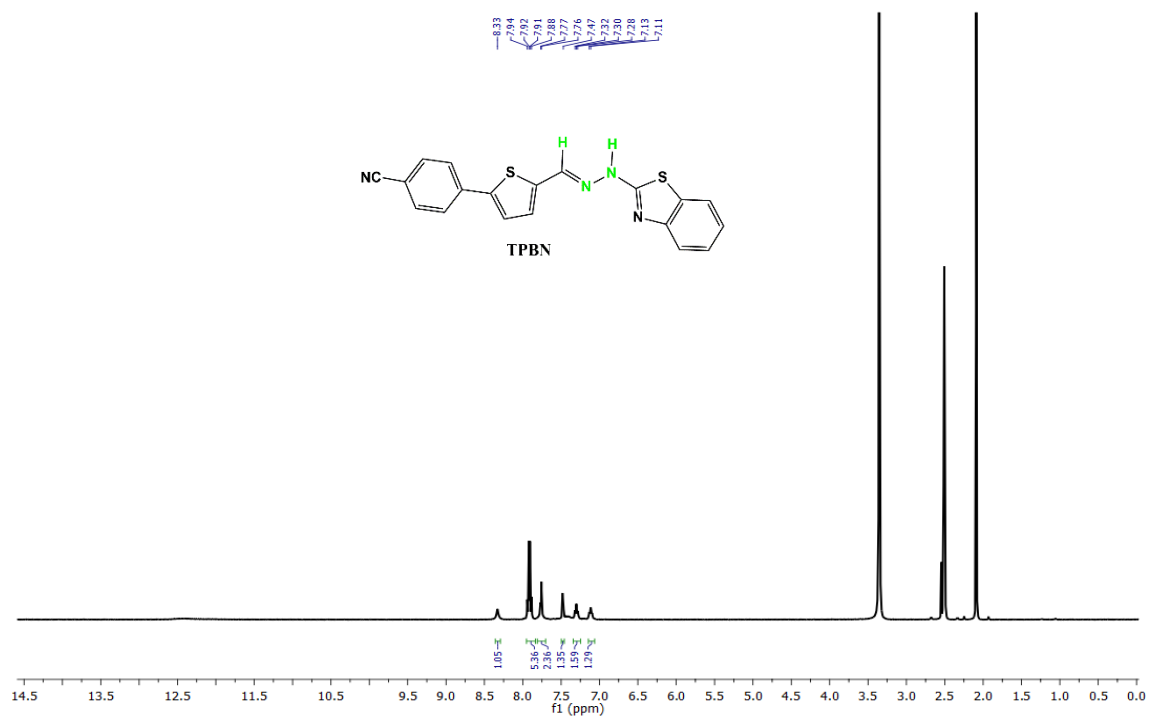

Figure S12:  $^1\text{H}$ -NMR spectra of TPBN in  $\text{DMSO-d}_6$

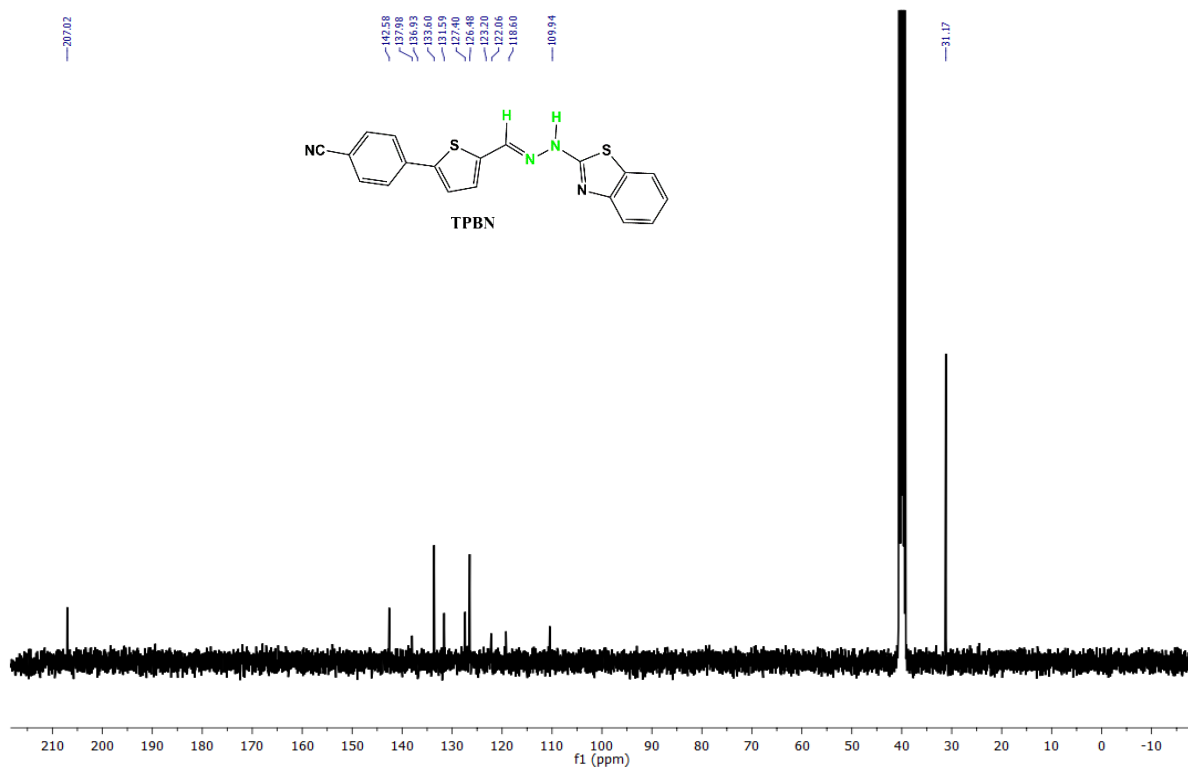

Figure S13 :<sup>13</sup>C-NMR spectra of TPBN in DMSO-d<sub>6</sub>

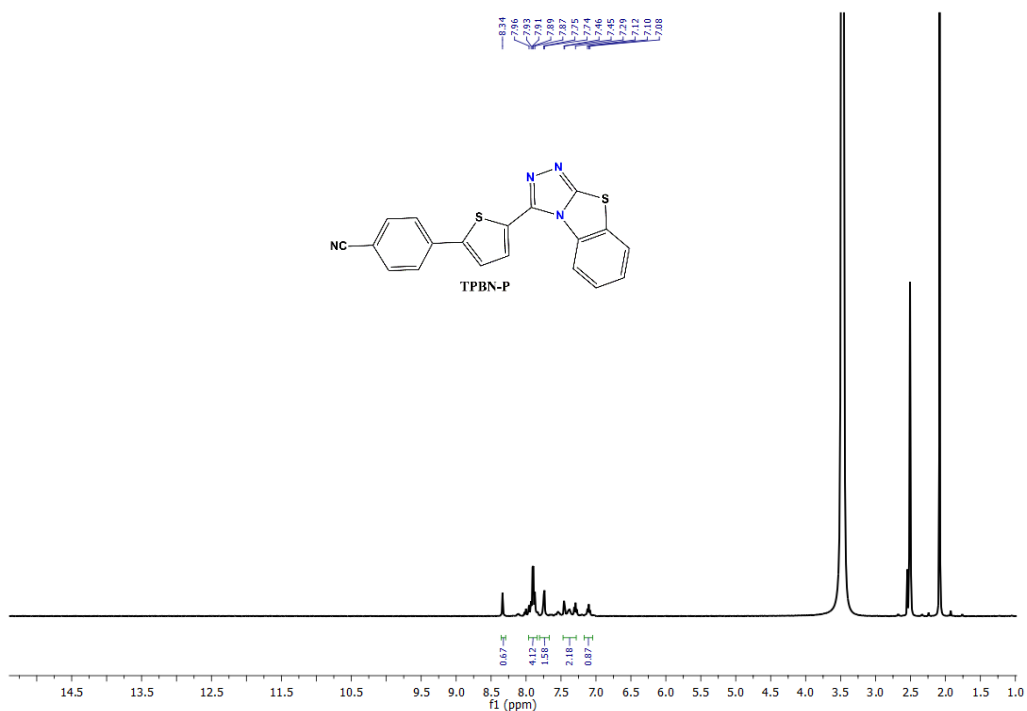

Figure S14: <sup>1</sup>H-NMR spectra of product TPBN-P in DMSO-d<sub>6</sub>

### 13. Mass spectra

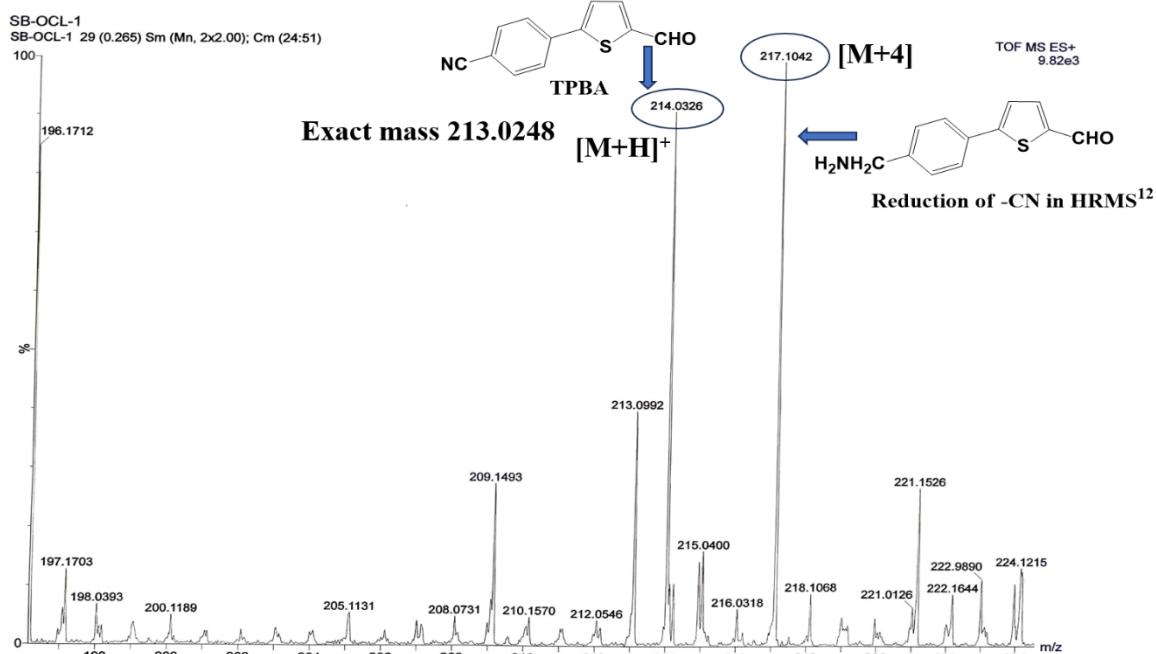

**Figure S15: ESI-MS of TPBA**

**Reference for reduction of -CN in HRMS:**

Z. Gu, J. Ma, X. Zhao, J. Wu, D. Zhang, *Rapid Commun. Mass Spectrom.*, 2006, **20**, 2969–2972

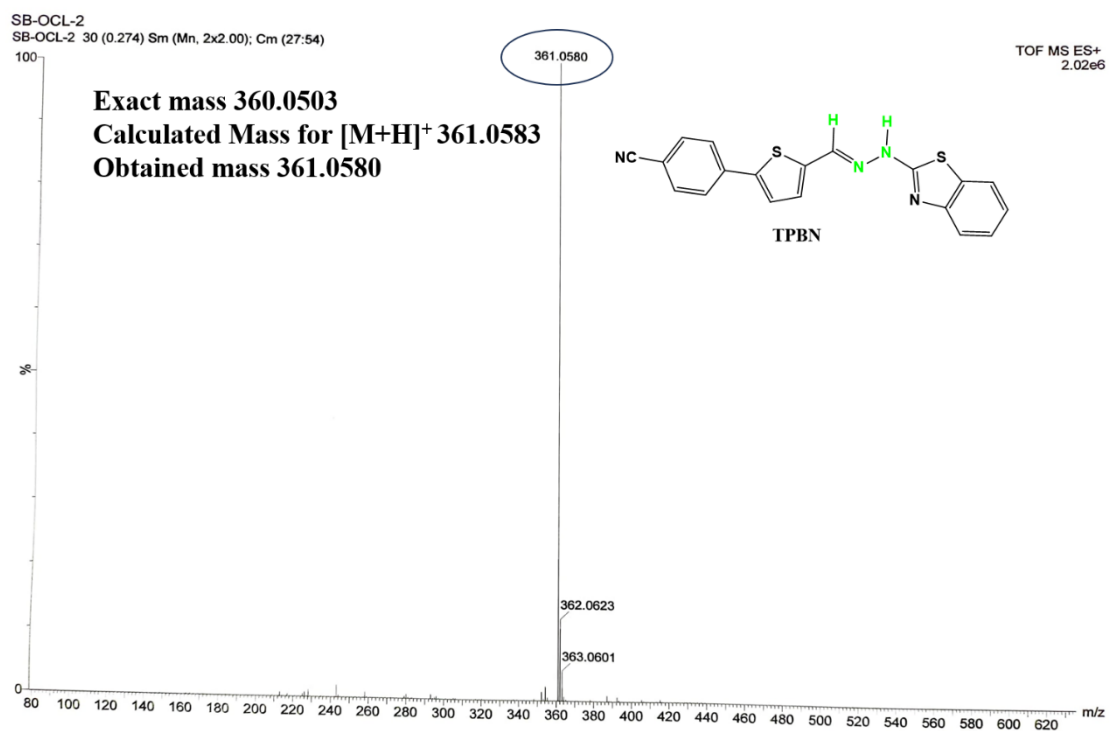

**Figure S16: ESI-MS of probe TPBN**

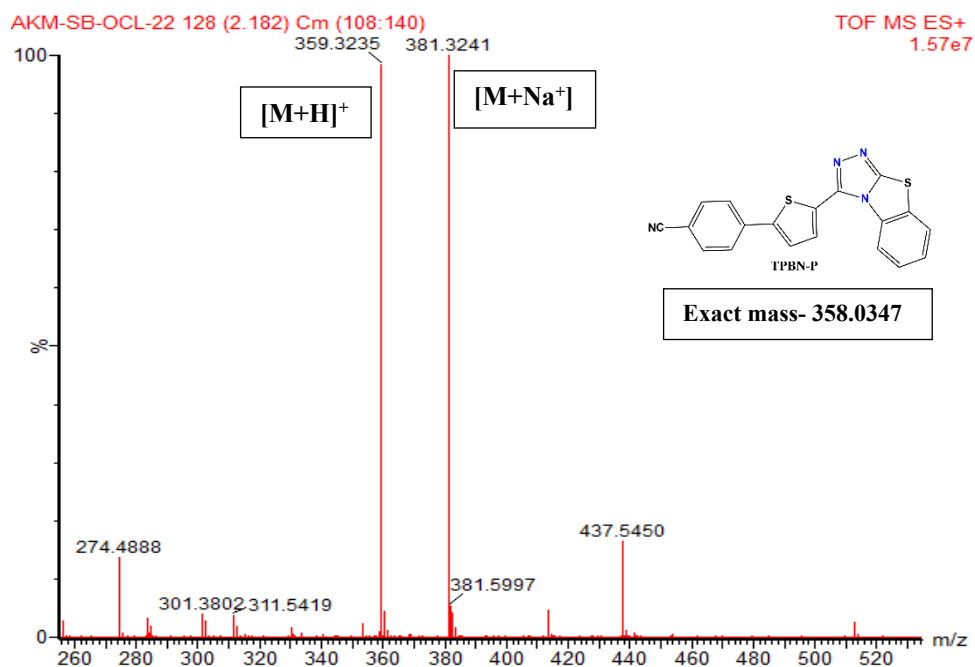

## Figure S17: ESI-MS of product TPBN-P

### 14. References:

1. W. Wang, J.Y. Ning, J.T. Liu, J.Y. Miao and B.X. Zhao, *Dyes and Pigments*, 2019, **171**, 107708.
2. G. Zhou, S. Hou, N. Zhao, N. Finney and Y. wang, *Dyes and Pigments*, 2022, **204**, 110394.
3. N.N. Li, Y.E. Gao, X.Y. Xu, P. Qiu, Y. Gao, M. Yan, Q. Zhang, W.Y. Lin, Z.Y. Xing and Z.A. Zong, *Dyes and Pigments*, 2023, **210**,110965.
4. Q. Yang, X. Zhong, Y. Chen, J. Yang, C. Jin and Y. Jiang, *Analyst*, 2020, **145**, 3100.
5. R. Chen, S. Xing, T. Hu, Y. Li, J. Chen, Q. Niu and T. Li, *Analytica Chimica Acta*, 2023, **1237**, 340557.
6. P. A. Kim, D. Choe, H. So, S. Park, B. Suh, S. Jeong, K.T. Kim, C. Kim and R.G. Harrison, *Spectrochimica Acta Part A: Molecular and Biomolecular Spectroscopy*, 2021, **261**, 120059.
7. L. Zhen, J. Lan, S. Zhang, L. Liu, R. Zeng, Y. Chen and Y. Ding, *Analytical Methods*, 2022, **14**, 2147-2152.
8. C. Jiang, Y. Yao, C. Kong, J. Du, J. Meng and C. Yao, *Analytical Methods*, 2019, **11**, 4157.
9. M. Mandal, U.N. Guria, S. Halder, A. Karak, D. Banik, K. Jana, A. Kar and A.K. Mahapatra, *Organic and Biomolecular Chemistry*, 2022, **20**, 4803.
10. P.R. Twentyman and M. Luscombe, *Br J Cancer.*, 1987, **56**, 279-85.
11. S. Paul, S. Maity, S. Halder, B. Dutta, S. Jana, K. Jana and C. Sinha, *Dalton Trans.*, 2022, **51**, 3198-3212.
12. Z. Gu, J. Ma, X. Zhao, J. Wu, D. Zhang, *Rapid Commun. Mass Spectrom.*, 2006, **20**, 2969–2972
